# Supplementary material for: Urbanisation and asthma in low-income and middle-income countries: a systematic review of the urban–rural differences in asthma prevalence
Source: PubMed Central journal article supplement (PMC6860411; doi:10.1136/thoraxjnl-2018-211793), 2019-07-05

### Supplementary Figures

**Supplementary Figure 1. Search terms and equations used for this review in PubMed, Scielo databases.**

(asthma[tiab]) OR asthma prevalence\*[tiab] OR wheeze\*[tiab]  
OR allergic diseases[tiab] OR allergic disorders[tiab] OR allerg\*[tiab])  
AND  
(urbanization[tiab] OR urbanisation[tiab] OR urban area[tiab] OR rural area[tiab]  
OR urban rural difference[tiab] OR rural urban comparison[tiab] OR urban environment  
OR urban population[tiab] OR metropolitan area OR city OR inner-city[tiab]  
OR municipal OR urban neighbourhood[tiab] OR country-side OR provincial  
OR provincial OR rural community[Mesh]).  
OR  
(urban indicators[tiab] OR urban poverty OR socioeconomic status  
OR urban deprivation OR socioeconomic factors  
OR deprived areas OR rural poverty[Mesh])

**Supplementary Figure 2. Funnel Plots for asthma studies comparing populations living in urban versus rural areas by asthma definitions: (A) current wheeze, (B) wheeze ever, (C) doctor diagnosis, (D) exercise test, (E) self-reported asthma, and (F) asthma questionnaire.**

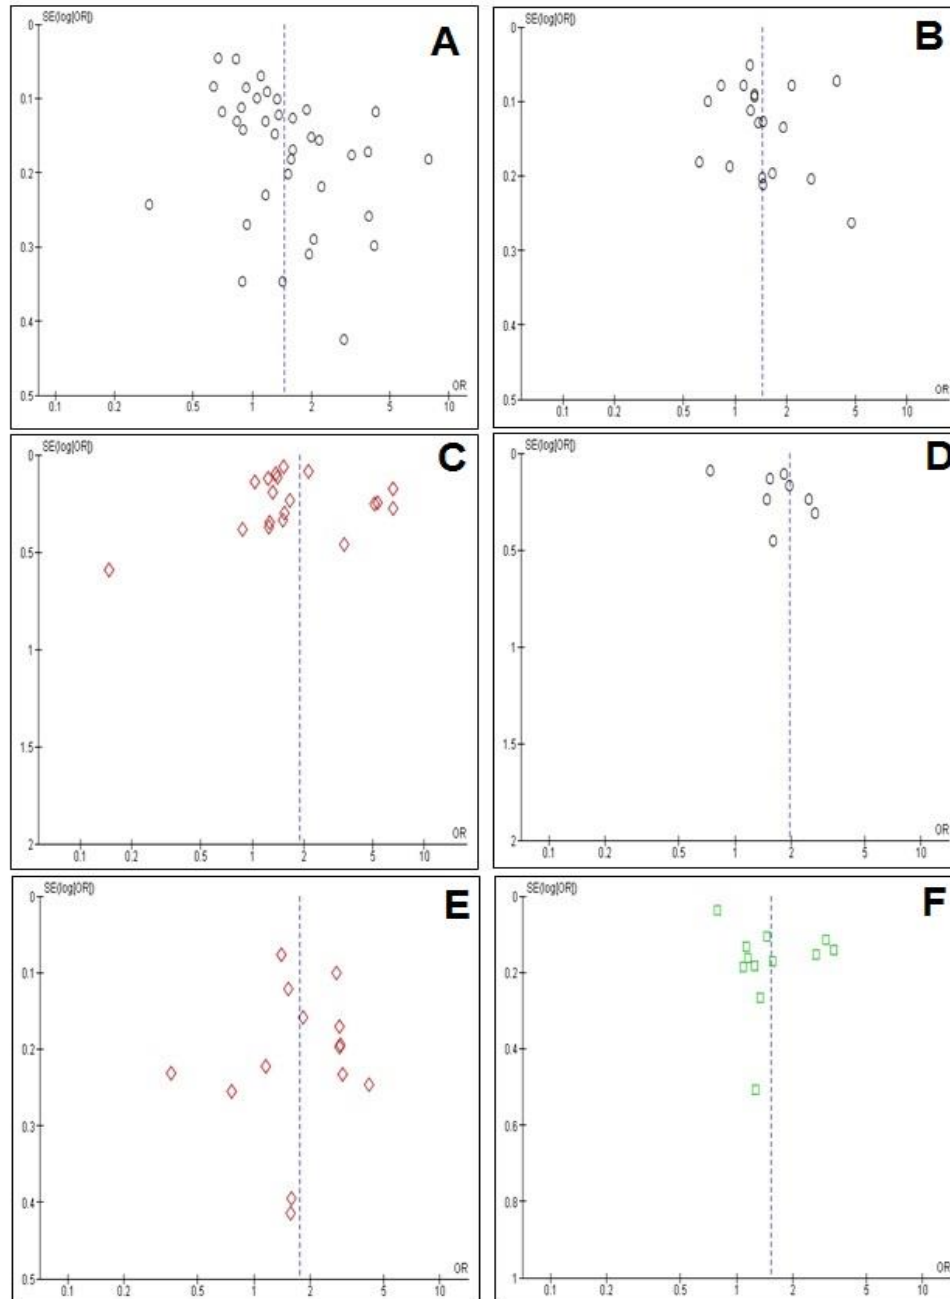

**Supplementary Figures 3. Forest Plot and unadjusted Odd Ratios for asthma comparing populations living in urban versus rural areas by populations groups: (A) 0 – 12 years, (B) 12-18 years and (C) 0-18 years.**

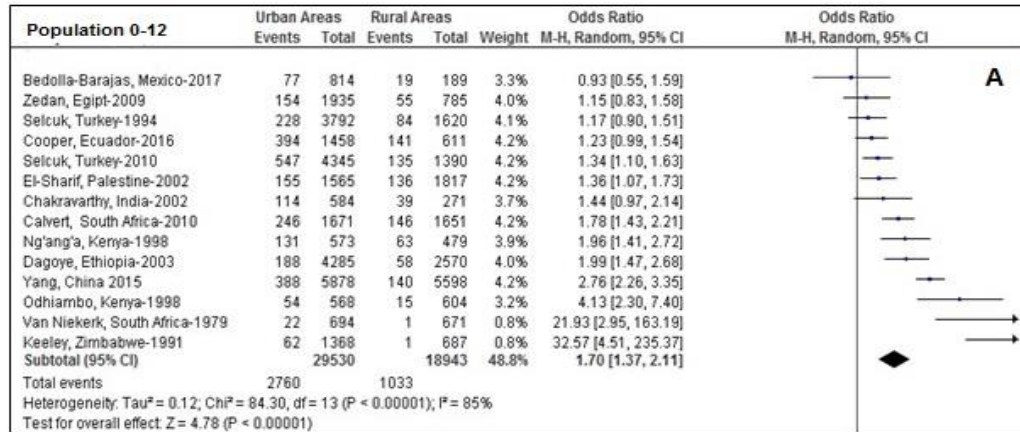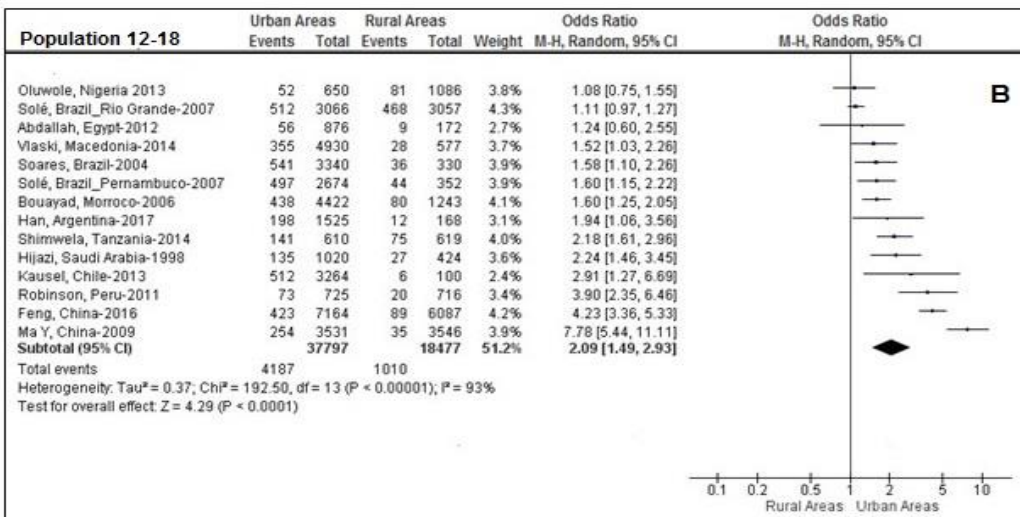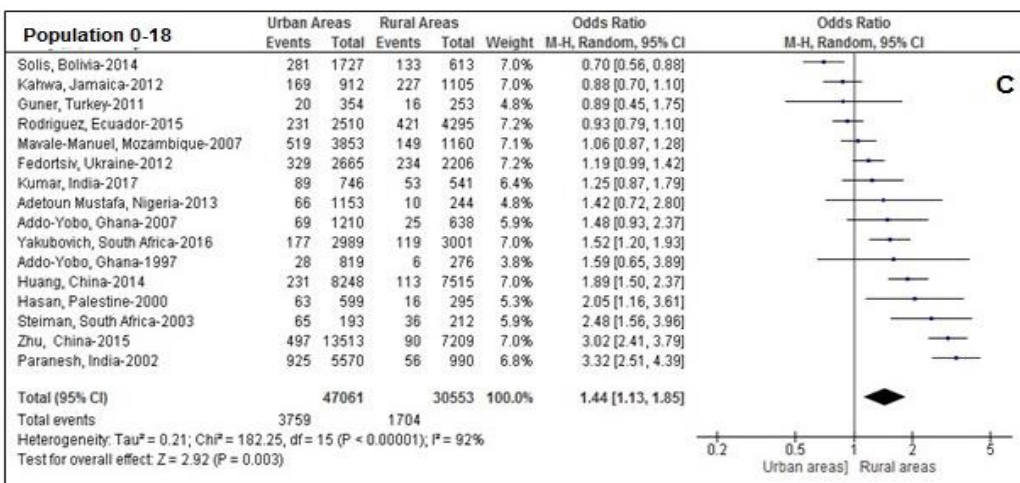

**Supplementary Figures 4. Forest Plot and unadjusted Odd Ratios for asthma comparing populations living in urban versus rural areas by populations groups: (D) >18 years and (E) 0-65 years.**

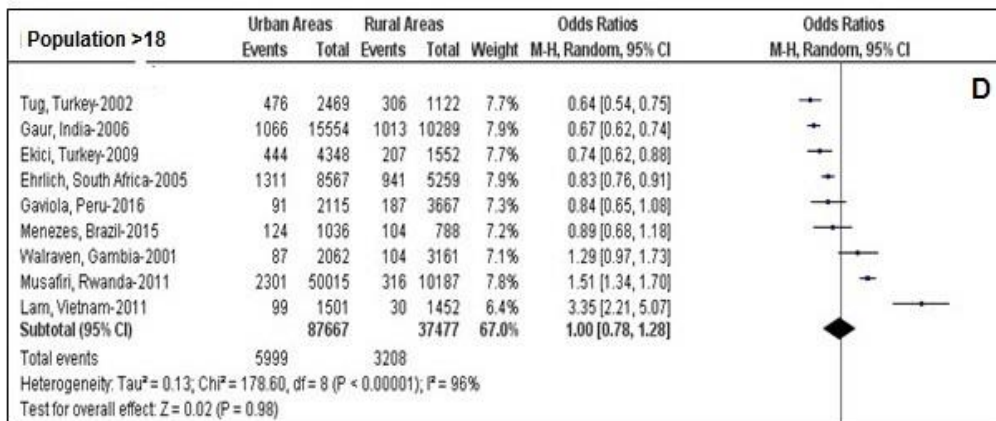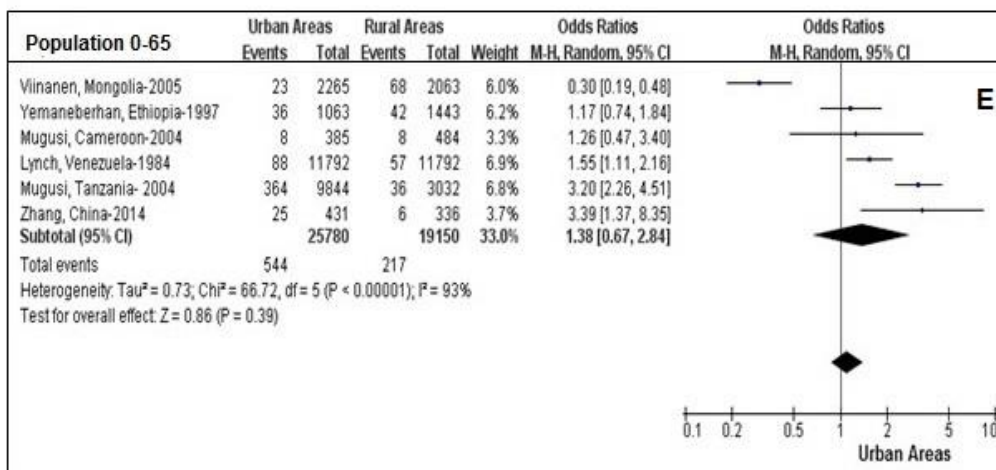

**Supplementary Figures 5. Forest Plot and unadjusted Odd Ratios for asthma comparing populations living in urban versus rural areas by gross national income: (A) Low income countries, (B) Low middle-income countries, and (C) Upper middle-income countries.**

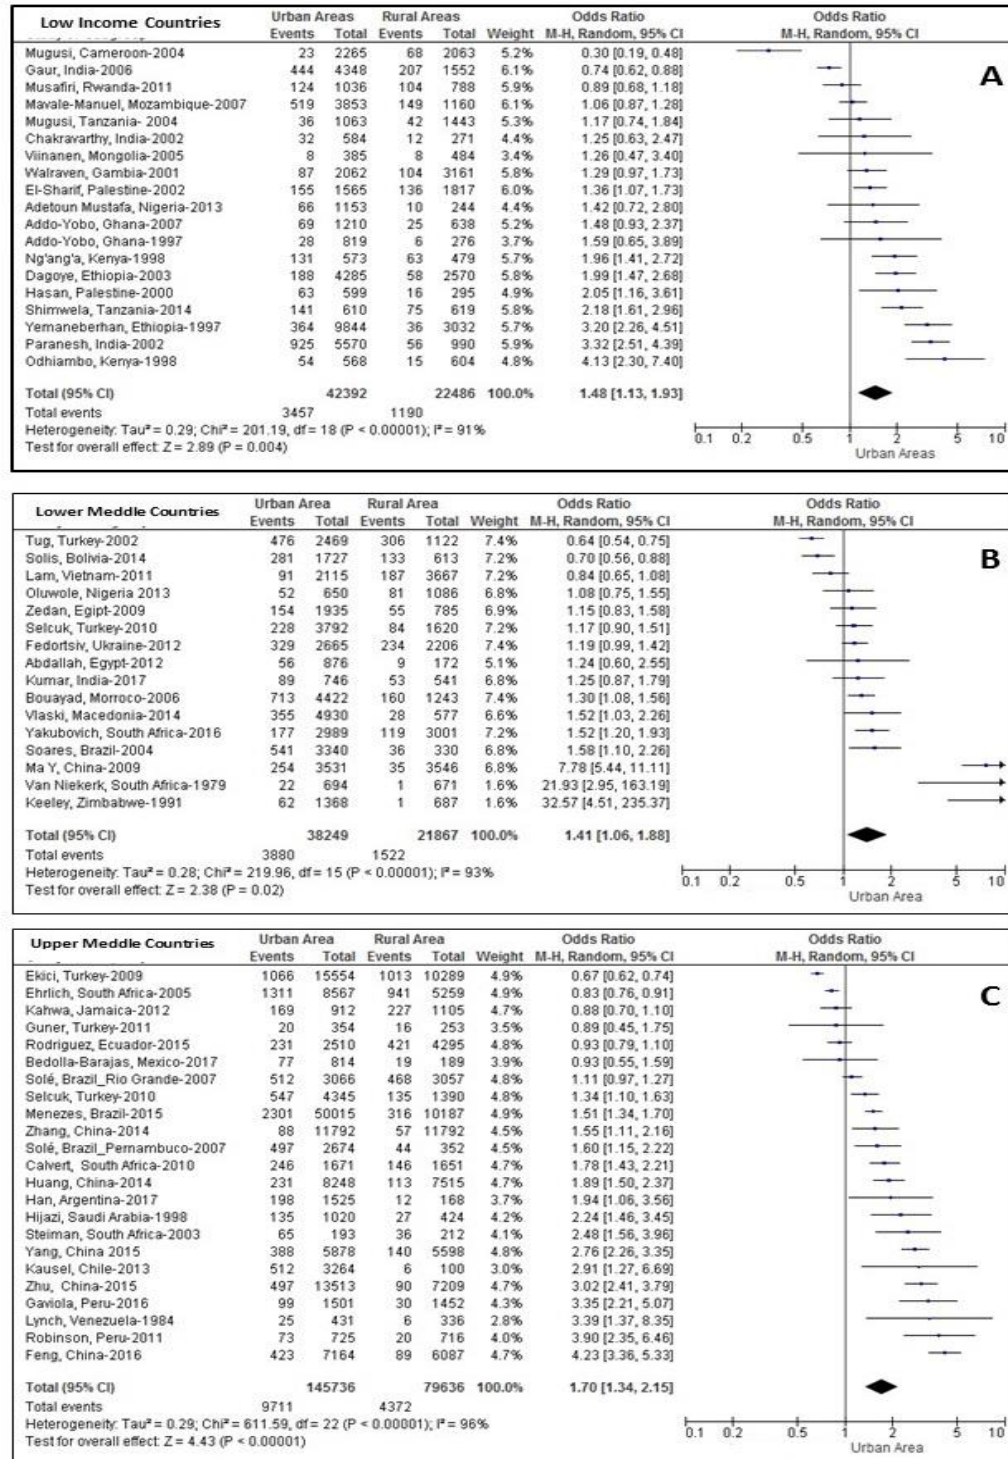



**Supplementary Figures 6. Forest Plot and unadjusted Odd Ratios for asthma comparing populations living in urban versus rural areas by region: (A) African countries, (B) Asian countries, and (C) Latin American countries.**

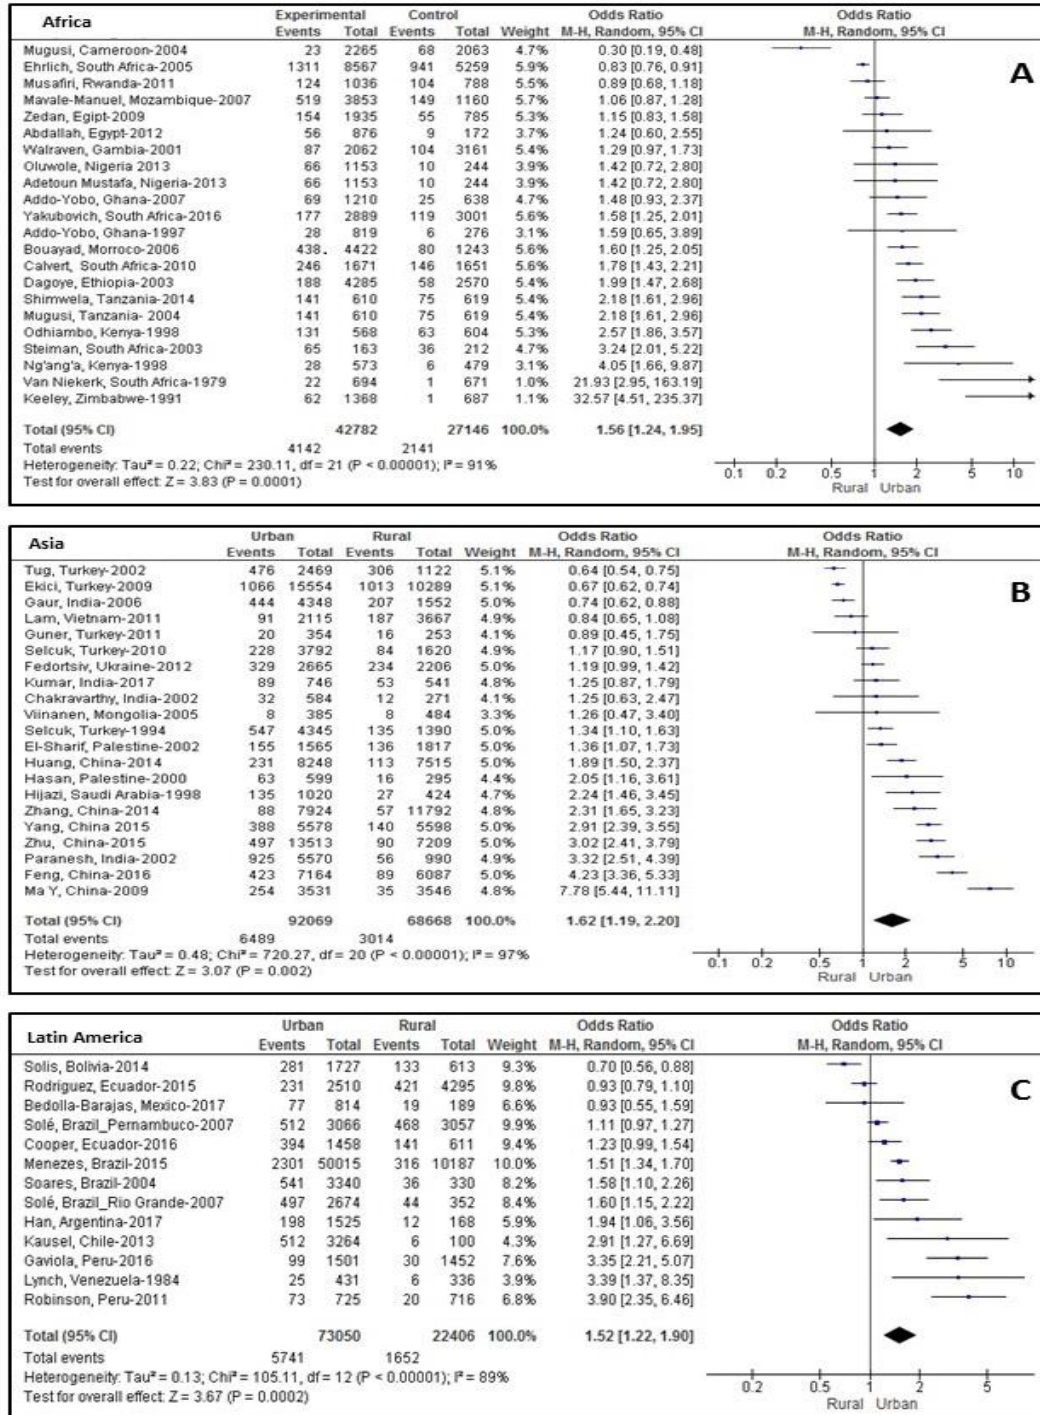

Supplement: thoraxjnl-2018-211793supp001.pdf [file thoraxjnl-2018-211793supp001.pdf]
