# Supplementary material for: Urbanisation and asthma in low-income and middle-income countries: a systematic review of the urban–rural differences in asthma prevalence
Source: PubMed Central journal article supplement (PMC6860411; doi:10.1136/thoraxjnl-2018-211793), 2019-07-05
Supplement: thoraxjnl-2018-211793supp002.pdf [file thoraxjnl-2018-211793supp002.pdf]

### Supplementary Tables

**Supplementary Table 1. Re-classification of publications using more than one category to define urban or rural settings in asthma studies.**

| Publication                                  | Asthma definition (AD)       | Categories          | New Categories | AD 1 (%) | AD 2 (%) | AD 3 (%) | Urban vs rural Prevalence (%) |
|----------------------------------------------|------------------------------|---------------------|----------------|----------|----------|----------|-------------------------------|
| Addo-Yobo et al. (10)<br>Ghana, 2007         | AD1. Exercise challenge test | Urban Rich          | Urban          | 8.3      |          |          | 5.65 vs 3.9                   |
|                                              |                              | Urban Poor          | Urban          | 3        |          |          |                               |
|                                              |                              | Rural               | Rural          | 3.9      |          |          |                               |
| Addo-Yobo et al. (28)<br>Ghana, 1997         | AD1. Exercise challenge test | Urban Rich          | Urban          | 4.2      |          |          | 3.42 vs 2.2                   |
|                                              |                              | Urban Poor          | Urban          | 1.4      |          |          |                               |
|                                              |                              | Rural               | Rural          | 2.2      |          |          |                               |
| Bouayad et al. (59)<br>Morocco, 2006         | AD1. Current wheeze          | Casablanca city     | Urban          | 16.2     | 23.9     |          | 9.91 vs 6.44                  |
|                                              | AD2. Wheezing ever           | Marrakech city      | Urban          | 4.6      | 10.3     |          | 16.13 vs 12.9                 |
|                                              |                              | Ben Slimane city    | Urban          | 8.9      | 14.2     |          |                               |
|                                              |                              | Boulmane rural area | Rural          | 6.4      | 12.9     |          |                               |
| El-Sharif et al. (33)<br>Palestine, 2002     | AD1. Current wheeze          | Refugee camps       | Urban          | 12.6     | 22.1     | 15.6     | 9.9 vs 7.46                   |
|                                              | AD2. Wheeze ever             | Cities              | Urban          | 7.2      | 16.5     | 7.3      | 19.3 vs 16.6                  |
|                                              |                              | Semi urban          | Rural          | 6.3      | 12.9     | 5.6      |                               |
|                                              | AD3. Doctor diagnosis        | Typical rural       | Rural          | 10.2     | 18.1     | 10       | 11.45 vs 8.5                  |
|                                              |                              | Primitive           | Rural          | 5.9      | 15.8     | 9.9      |                               |
| Keeley et al. (32)<br>Zimbabwe, 1991         | AD1. Exercise challenge test | Urban North         | Urban          | 5.8      |          |          | 4.45 vs 0.15                  |
|                                              |                              | Urban South         | Urban          | 3.1      |          |          |                               |
|                                              |                              | Rural               | Rural          | 0.01     |          |          |                               |
| Steiman et al. (31)<br>South Africa, 2003    | AD1. Exercise challenge test | Urban School        | Urban          | 32.9     |          |          | 33.65 vs 17                   |
|                                              |                              | Recently urbanized  | Urban          | 34.4     |          |          |                               |
|                                              |                              | Rural school        | Rural          | 17       |          |          |                               |
| Viinamen et al. (24)<br>Mongolia, 2005       | AD1. Questionnaire diagnosis | City                | Urban          | 2.1      |          |          | 2.1 vs 1.75                   |
|                                              |                              | Rural towns         | Rural          | 2.4      |          |          |                               |
|                                              |                              | Villages            | Rural          | 1.1      |          |          |                               |
| Gaur et al. (29)<br>India, 2006              | AD1. Exercise challenge test | Urban city          | Urban          | 7.7      |          |          | 10.21 vs 13.3                 |
|                                              |                              | Urban slum          | Urban          | 11.9     |          |          |                               |
|                                              |                              | Rural               | Rural          | 13.3     |          |          |                               |
| Mavale-Manuel et al (27)<br>Mozambique, 2007 | AD1. Current wheeze          | Urban               | Urban          | 13.6     | 25.15    |          | 13.5 vs 12.8                  |
|                                              | AD2. Wheeze ever             | Suburban            | Urban          | 13.5     | 24       |          | 24.58 vs 22.6                 |
|                                              |                              | Semirural           | Rural          | 12.9     | 22.6     |          |                               |
| Kausel et al. (26)<br>Chile, 2013            | AD1. Current wheeze          | Urban               | Urban          | 16       | 15.8     |          | 15.69 vs 6                    |
|                                              | AD2. Self-reported asthma    | Semiurban           | Urban          | 10       | 17.6     |          | 16 vs 20                      |
|                                              |                              | Rural               | Rural          | 6        | 20       |          |                               |
| Gaviola et al. (24)<br>Peru, 2016            | AD1. Current wheeze          | Urban_Lima          | Urban          | 9.9      | 8.2      |          | 5.85 vs 1.85                  |
|                                              | AD2. Doctor diagnosis        | Urban_Puno          | Urban          | 1.8      | 2.6      |          | 5.4 vs 1.15                   |
|                                              |                              | Semiurban_Tumbes    | Rural          | 2.5      | 1.7      |          |                               |
|                                              |                              | Rural_Puno          | Rural          | 1.2      | 0.6      |          |                               |

**Supplementary Table 2. Differences in asthma prevalence between urban and rural populations by asthma definition.**

| Author (reference)        | Country, year      | Wheeze ever    |      | Current Wheeze |      | Doctor diagnosis |      | Exercise test  |      | Self-reported  |      | Questionnaire  |      |
|---------------------------|--------------------|----------------|------|----------------|------|------------------|------|----------------|------|----------------|------|----------------|------|
|                           |                    | Urban vs Rural | diff | Urban vs Rural | diff | Urban vs Rural   | diff | Urban vs Rural | diff | Urban vs Rural | diff | Urban vs Rural | diff |
| Addo-Yobo et al.(10)      | Ghana, 2007        |                |      |                |      |                  |      | 5.7 vs 3.9     | **   |                |      |                |      |
| Selcut et al. (11)        | Turkey, 2010       |                |      | 6 vs 5.2       | **   |                  |      |                |      |                |      | 5.8 vs 5.2     | **   |
| Selcut et al. (11)        | Turkey, 2010       |                |      | 12.6 vs 9.7    | ***  |                  |      |                |      |                |      | 12.1 vs 8.6    | ***  |
| Oluwole et al.(57)        | Nigeria , 2013     |                |      |                |      |                  |      |                |      |                |      | 8 vs 7.5       | **   |
| Yang et al. (73)          | China , 2015       |                |      |                |      |                  |      |                |      |                |      | 6.6 vs 2.5     | ***  |
| Kahwa et al. (77 )        | Jamaica, 2012      |                |      | 18.5 vs 20.5   | *    | 18.3 vs 15.4     | **   |                |      |                |      |                |      |
| Mavale-Manuel et al. (27) | Mozambique. 2007   | 24.6 vs 22.4   | **   | 13.5 vs 12.8   | **   |                  |      |                |      |                |      |                |      |
| Hijazi et al. (67)        | Saudi Arabia, 1998 | 17.8 vs 7.3    | ***  | 13.2 vs 6.4    | ***  |                  |      |                |      | 14.9 vs 5.4    | ***  |                |      |
| Walraven et al. (54)      | Gambia, 2001       |                |      | 4.2 vs 3.3     | **   | 3.6 vs 0.7       | ***  |                |      |                |      |                |      |
| Solis et al. (78)         | Bolivia, 2014      | 27.4 vs 34.9   | *    | 16.4 vs 21.7   | *    |                  |      | 19.2 vs 13.1   | **   |                |      |                |      |
| Solé et al. (22)          | Brazil, 2007       | 32.6 vs 23     | ***  | 18.6 vs 12.5   | ***  |                  |      |                |      | 21.1 vs 8.5    | ***  |                |      |
| Solé et al. (22)          | Brazil, 2007       | 42.1 vs 37.4   | ***  | 16.7 vs 15.3   | **   |                  |      |                |      | 14.9 vs 11.1   | ***  |                |      |
| Steiman et al. (31)       | South Africa, 2003 |                |      |                |      |                  |      | 33.7 vs 17     | ***  |                |      |                |      |
| Kausel et al. (26)        | Chile, 2013        |                |      | 15.7 vs 6      | ***  |                  |      |                |      | 16 vs 20       | *    |                |      |
| Zhang et al. (68)         | China, 2014        |                |      |                |      |                  |      |                |      |                |      | 1.1 vs 0.5     | ***  |
| Keeley et al. (32)        | Zimbabwe, 1991     |                |      |                |      |                  |      | 4.5 vs 0.2     | ***  |                |      |                |      |
| Robinson et al. (79)      | Peru, 2011         |                |      | 10.1 vs 2.8    | ***  | 13 vs 2.2        | ***  |                |      | 11.6 vs 3.1    | ***  |                |      |
| Abdalla et al. (55)       | Egypt, 2012        |                |      |                |      | 6.4 vs 5.2       | **   |                |      |                |      |                |      |
| Yemaneberhan et al. (56)  | Ethiopia, 1997     |                |      | 3.7 vs 1.2     | ***  |                  |      |                |      | 3.6 vs 1.3     | ***  |                |      |
| Addo-Yobo et al. (28)     | Ghana,1997         |                |      |                |      |                  |      | 3.4 vs 2.2     | **   |                |      |                |      |
| Vlaski et al. (85)        | Macedonia, 2014    |                |      | 7.2 vs 4.9     | ***  |                  |      |                |      | 1.9 vs 1.2     | **   |                |      |
| El-Sharif et al. (33)     | Palestine, 2002    | 19.3 vs 15.6   | ***  | 9.9 vs 7.5     | ***  | 11.5 vs 8.5      | ***  |                |      |                |      |                |      |
| Adetoun et al.(43)        | Nigeria,2013       |                |      | 5.7 vs 4.1     | **   | 0.4 vs 2.9       | *    |                |      |                |      |                |      |
| Viininen et al. (30)      | Mongolia, 2005     |                |      |                |      |                  |      |                |      |                |      | 2.1 vs 1.8     | **   |
| Gaur et al.(29)           | India, 2006        |                |      |                |      |                  |      | 10.2 vs 13.3   | *    |                |      |                |      |
| Ng'ang'a et al. (44)      | Kenya, 1998        |                |      |                |      |                  |      | 22.9 vs 13.2   | ***  |                |      |                |      |
| Musafiri et al. (45)      | Rwanda, 2011       |                |      | 11.9 vs 13.1   | *    | 7.3 vs 5.7       | **   |                |      |                |      | 19.3 vs 8.3    | ***  |
| Calvert et al. ( 46)      | South Africa, 2015 |                |      |                |      |                  |      | 14.9 vs 8.7    | ***  |                |      |                |      |
| Shimwela et al. (47)      | Tanzania, 2014     |                |      | 23.1 vs 12.1   | ***  |                  |      | 6.3 vs 2.4     | ***  | 17.1 vs 6.6    | ***  |                |      |
| Guner et al. (69)         | Turkey, 2011       |                |      | 5.6 vs 6.3     | *    | 10.5 vs 7.1      | **   |                |      |                |      | 12.7 vs 9.9    | **   |
| Fedortsiv et al. (70)     | Ukraine, 2012      |                |      | 12.4 vs 10.6   | **   | 2.6 vs 1.3       | ***  |                |      |                |      |                |      |
| Lâm et al. (71)           | Vietnam, 2011      | 5.6 vs 3.9     | ***  | 4.3 vs 5.1     | *    | 3.9 vs 3.8       | **   |                |      |                |      |                |      |

|                          |                    |              |     |              |     |            |     |              |     |
|--------------------------|--------------------|--------------|-----|--------------|-----|------------|-----|--------------|-----|
| Dagoye et al. (48)       | Ethiopia, 2003     |              |     | 4.4 vs 2     | *** |            |     |              |     |
| Ekici et al. (72)        | Turkey 2009        |              |     | 6.9 vs 9.9   | *   |            |     | 11.4 vs 14.1 | *   |
| Rodriguez et al. (80)    | Ecuador, 2015      |              |     | 9.4 vs 10.1  | *   |            |     |              |     |
| Van Niekerk et al.A (49) | South Africa, 1979 |              |     |              |     | 3.2 vs 0.1 | *** |              |     |
| Hasan et al. (58)        | Palestine, 2000    | 16.4 vs 12   | **  | 10.5 vs 5.5  | *** |            |     | 4.2 vs 2.8   | **  |
| Odhiambo et al. (50)     | Kenya, 1998        | 13.4 vs 3.2  | *** | 9.5 vs 2.5   | *** | 4.2 vs 0.2 | *** |              |     |
| Feng et al. (59)         | China, 2016        | 14.6 vs 4.2  | *** | 6.1 vs 1.5   | *** | 6.9 vs 3.4 | *** |              |     |
| Paranesh et al. (60)     | India, 2002        |              |     |              |     |            |     | 16.6 vs 5.7  | *** |
| Soares et al. (81)       | Brazil, 2004       | 37 vs 23.6   | *** | 16.2 vs 10.9 | *** |            |     | 24.7 vs 15.2 | *** |
| Ma Y et al. (61)         | China, 2009        |              |     | 7.2 vs 1     | *** | 6.3 vs 1.1 | *** |              |     |
| Huang et al. (62)        | China, 2014        | 6.6 vs 3.2   | *** | 2.8 vs 1.5   | *** |            |     |              |     |
| Cooper et al. (82)       | Ecuador, 2016      | 27 vs 23     | **  |              |     |            |     |              |     |
| Bedolla et al. (83)      | Mexico, 2017       | 23.5 vs 24.9 | *   | 9.5 vs 10.1  | *   | 8.5 vs 5.8 | **  |              |     |
| Zhu et al. (63)          | China, 2015        |              |     |              |     |            |     | 3.7 vs 1.3   | *** |
| Chakravarthy et al. (64) | India, 2002        | 19.6 vs 14.4 | **  |              |     | 5.4 vs 4.5 | **  |              |     |
| Menezes et al. (74)      | Brasil, 2015       |              |     |              |     | 4.6 vs 3.1 | *** |              |     |
| Tug et al. (65)          | Turkey, 2002       | 25.8 vs 29.6 | *   | 19.3 vs 27.3 | *   |            |     |              |     |
| Zedan et al. (51)        | Egypt, 2009        |              |     |              |     |            |     | 8 vs 7       | **  |
| Mugusi et al. (23)       | Cameroon, 2004     | 5.6 vs 2.9   | *** | 3.4 vs 2.9   | **  |            |     | 3.7 vs 3.2   | **  |
| Mugusi et al. (23)       | Cameroon, 2004     | 2.3 vs 3.7   | *   | 1 vs 3.3     | *   |            |     | 1.2 vs 3.3   | *   |
| Gaviola et al. (24)      | Peru, 2016         |              |     | 11 vs 3.1    | *** | 6.3 vs 1.3 | *** |              |     |
| Yakubovich et al.E (52)  | South Africa, 2016 |              |     |              |     |            |     | 5.9 vs 4     | *** |
| Kumar et al. (66)        | India, 2017        |              |     |              |     |            |     | 11.9 vs 9.8  | **  |
| Han et al. (75)          | Argentina, 2017    |              |     | 13 vs 7.1    | *** | 4.3 vs 4.8 | *   |              |     |
| Ehrlich et al. (53)      | South Africa, 2005 |              |     | 15.3vs17.9   | *   | 4.2vs3.1   | *** |              |     |
| Lynch et al. (76)        | Venezuela, 1984    |              |     |              |     | 5.8 vs 1.8 | *** |              |     |
| Bouayad et al. (25)      | Morocco, 2006      | 16.13 vs12.9 | *** | 9.9 vs 6,4   | *** |            |     |              |     |

\*\*\*Higher in urban area and statistical significant. \*\* Higher in urban area and no statistical significant, \* Higher in rural area.

**Supplementary Table 3. Methodological quality of studies included in systematic review**

| Author (Country-year of publications)  | Area description | Population description | Sample method | Sample size | Urban definition | Response rate | Overall quality |
|----------------------------------------|------------------|------------------------|---------------|-------------|------------------|---------------|-----------------|
| Van Niekerk et al. (South Africa-1979) | +                | +                      | -             | +           | +                | unk           | Low             |
| Lynch et al. (Venezuela-1984)          | +                | +                      | -             | -           | +                | unk           | Low             |
| Keeley et al. (Zimbabwe-1991)          | +                | +                      | -             | +           | +                | unk           | Low             |
| Addo-Yobo et al. (Ghana*-1997)         | +                | +                      | -             | +           | +                | unk           | Low             |
| Yemaneberhan et al. (Ethiopia-1997)    | -                | -                      | +             | +           | +                | unk           | Low             |
| Hijazi et al. (Saudi Arabia-1998)      | +                | -                      | +             | +           | +                | unk           | Low             |
| Ng'ang'a et al. (Kenya-1998)           | +                | +                      | +             | +           | +                | +             | High            |
| Odhiambo et al. (Kenya-1998)           | +                | +                      | +             | +           | +                | +             | High            |
| Hasan et al. (Palestine-2000)          | +                | +                      | +             | +           | +                | +             | High            |
| Walraven et al. (Gambia-2001)          | +                | +                      | +             | +           | +                | +             | High            |
| Chakravarthy et al. (India-2002)       | +                | -                      | -             | +           | -                | +             | Low             |
| El-Sharif et al. (Palestine-2002)      | +                | +                      | +             | +           | -                | +             | Medium          |
| Paranesh et al. (India-2002)           | +                | +                      | -             | +           | -                | unk           | Low             |
| Tug et al. (Turkey-2002)               | +                | +                      | -             | +           | +                | +             | Medium          |
| Dagoye et al. (Ethiopia-2003)          | -                | -                      | -             | +           | +                | unk           | Low             |
| Steiman et al. (South Africa-2003)     | +                | +                      | -             | -           | +                | +             | Low             |
| Mugusi et al. (Tanzania-2004)          | +                | +                      | +             | +           | +                | unk           | Medium          |
| Mugusi et al. (Cameroon-2004)          | +                | +                      | +             | +           | +                | unk           | Medium          |
| Maia et al. (Brazil-2004)              | +                | +                      | +             | +           | +                | unk           | Medium          |
| Ehrlich et al. (South Africa-2005)     | -                | +                      | +             | +           | +                | +             | Medium          |
| Viinanan et al. (Mongolia-2005)        | +                | +                      | +             | +           | +                | +             | High            |
| Bouayad et al. (Morocco-2005)          | +                | +                      | -             | +           | +                | -             | Low             |
| Gaur et al. (India*-2006)              | +                | +                      | -             | +           | +                | unk           | Low             |
| Addo-Yobo et al. (Ghana*-2007)         | +                | +                      | -             | +           | +                | unk           | Low             |
| Cunha et al. (Brazil-2007)             | -                | +                      | +             | +           | +                | na            | Medium          |
| Mavale-Manuel et al. (Mozambique-2007) | +                | +                      | +             | +           | +                | +             | High            |
| Solé et al. (Brazil^-2007)             | +                | +                      | +             | +           | +                | unk           | Medium          |
| Solé et al. (Brazil^-2007)             | +                | +                      | +             | +           | +                | unk           | Medium          |
| Ekici A et al. (Turkey-2009)           | +                | -                      | +             | +           | -                | +             | Low             |
| Ma Y et al. (China-2009)               | -                | +                      | +             | +           | -                | unk           | Low             |
| Zedan et al. (Egypt-2009)              | -                | -                      | +             | +           | +                | +             | Low             |
| Calvert et al. (South Africa-2010)     | +                | +                      | +             | +           | +                | unk           | Medium          |
| Selcuk et al. (Turkey*-2010)           | +                | +                      | +             | +           | +                | +             | High            |
| Selcuk et al. (Turkey*-2010)           | +                | +                      | +             | +           | +                | +             | High            |
| Guner et al. (Turkey-2011)             | -                | -                      | +             | -           | -                | +             | Low             |
| Oluwole et al. (Nigeria-2013)          | -                | -                      | -             | +           | +                | unk           | Low             |
| Yang et al. (China-2015)               | -                | -                      | -             | +           | +                | unk           | Low             |
| Lam et al. (Vietnam-2011)              | +                | +                      | +             | +           | +                | +             | High            |
| Musafiri et al. (Rwanda-2011)          | +                | +                      | +             | +           | +                | +             | High            |
| Robinson et al. (Peru-2011)            | +                | +                      | -             | +           | +                | +             | Medium          |
| Rodriguez et al. (Ecuador-2011)        | +                | +                      | +             | +           | +                | na            | High            |
| Abdallah et al. (Egypt-2012)           | +                | +                      | +             | +           | +                | +             | High            |
| Fedortsiv et al. (Ukraine-2012)        | -                | -                      | +             | +           | -                | +             | Low             |
| Kahwa et al. (Jamaica-2012)            | +                | +                      | +             | +           | +                | +             | High            |
| Adetoun Mustapha et al. (Nigeria-2013) | +                | +                      | +             | +           | +                | +             | High            |
| Kausel et al. (Chile-2013)             | +                | -                      | -             | +           | +                | unk           | Low             |
| Antunes et al (Brazil-2014)            | -                | -                      | +             | +           | +                | na            | Low             |
| Fatore et al. (Latin America-2014)     | +                | +                      | +             | +           | +                | na            | High            |
| Huang et al. (China-2014)              | +                | +                      | -             | +           | +                | unk           | Low             |
| Shimwela et al. (Tanzania-2014)        | +                | +                      | +             | +           | +                | +             | High            |
| Solis et al. (Bolivia-2014)            | +                | +                      | +             | +           | +                | +             | High            |
| Vlaski et al. (Macedonia-2014)         | +                | +                      | +             | +           | +                | +             | High            |
| Zhang et al. (China-2014)              | -                | +                      | +             | +           | +                | +             | Medium          |

|                                       |   |   |   |   |   |     |        |
|---------------------------------------|---|---|---|---|---|-----|--------|
| Menezes et al. (Brasil-2015)          | - | - | + | + | - | unk | Low    |
| Rodríguez et al. (Ecuador-2015)       | + | + | - | + | + | +   | Medium |
| Cooper et al. (Ecuador-2016)          | + | + | - | + | - | +   | Low    |
| Tabalipa et al. (Brazil-2015)         | + | + | + | + | + | na  | High   |
| Feng, et al. (China-2015)             | + | + | + | + | + | +   | High   |
| Zhu et al. (China-2015)               | + | + | + | + | + | +   | High   |
| Yakubovich et al. (South Africa-2016) | + | + | + | + | + | unk | Medium |
| Dias et al. (Brazil-2016)             | + | + | + | + | + | na  | High   |
| Ponte et al. (Brazil-2016)            | - | + | + | + | + | na  | Medium |
| Gaviola et al. (Peru-2016)            | + | + | + | + | + | +   | High   |
| Bedolla-Barajas et al. (Mexico-2017)  | + | + | + | + | + | +   | High   |
| Han et al. (Argentina-2017)           | + | + | - | + | + | +   | Medium |
| Kumar et al. (India-2017)             | - | + | + | + | - | +   | Low    |

(na) not applicable; (unk) unknown; (+) adequate; (-) not adequate
